# Supplementary material for: Contribution of the uremic milieu to an increased pro-inflammatory monocytic phenotype in chronic kidney disease
Source: PubMed Central journal article supplement (PMC6629661; doi:10.1038/s41598-019-46724-5), 2019-07-15
Supplement: 41598_2019_46724_MOESM1_ESM.pdf [file 41598_2019_46724_MOESM1_ESM.pdf]

**Contribution of the uremic milieu to an increased pro-inflammatory monocytic phenotype in chronic kidney disease.**

Natalia Borges Bonan, Eva Schepers, Roberto Pecoits-Filho, Annemieke Dhondt, Anneleen Pletinck, Filip De Somer, Raymond Vanholder, Wim Van Biesen, Andréa Moreno-Amaral, Griet Glorieux.

Supplementary Figure 1

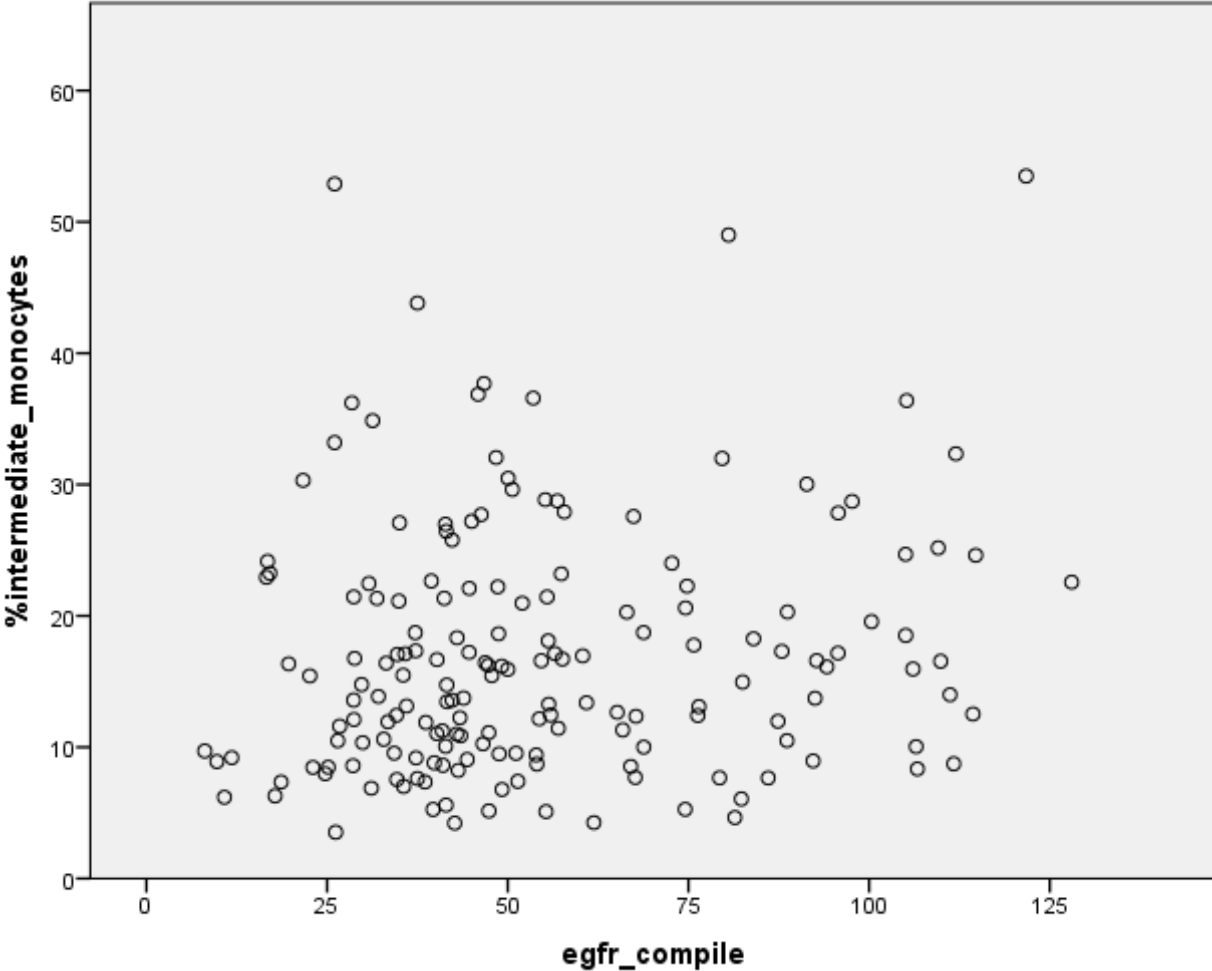

Supplementary Figure 1: Spearman’s correlation between eGFR and the percentage intermediate (CD14<sup>++</sup>CD16<sup>+</sup>) monocytes in CKD patients not on dialysis. Correlation coefficient 0.157; P=0.039.
